# Supplementary material for: Länger gesund im Beruf? Trends in den Lebensjahren frei von Herz-Kreislauf- und Muskel-Skelett-Erkrankungen in GKV-Daten für die Erwerbstätigen- und Allgemeinbevölkerung
Source: Springer Nature journal article supplement (doi:10.1007/s00103-024-03868-8), 2024-04-12
Supplement: MOESM1 [file 26970014]

# Bundesgesundheitsblatt

## Onlinematerial

### Länger gesund im Beruf? Trends in den Lebensjahren frei von Herz-Kreislauf- und Muskel-Skelett-Erkrankungen in GKV-Daten für die Erwerbstätigen- und Allgemeinbevölkerung

Juliane Tetzlaff<sup>1\*</sup>, Jelena Epping<sup>1</sup>

1 - Medizinische Soziologie, Medizinische Hochschule Hannover, Hannover, Niedersachsen, Deutschland

**\*Korrespondierende Autorin**

Medizinische Soziologie, Medizinische Hochschule Hannover, Carl-Neuberg Str. 1, 30625 Hannover, Deutschland

E-mail: [Tetzlaff.Juliane@mh-hannover.de](mailto:Tetzlaff.Juliane@mh-hannover.de)

Tabelle S1. Anteil der sozialversicherungspflichtig Beschäftigten an der Allgemeinbevölkerung zum 31. Dezember eines Jahres nach Geschlecht und Altersgruppen für die Bundesrepublik und die Versichertenpopulation der AOK Niedersachsen.

|          |              | BRD  |      |      |      |      |      |      | AOKN |      |      |      |      |      |      |
|----------|--------------|------|------|------|------|------|------|------|------|------|------|------|------|------|------|
|          |              | 2008 | 2011 | 2012 | 2013 | 2016 | 2017 | 2018 | 2008 | 2011 | 2012 | 2013 | 2016 | 2017 | 2018 |
| männlich | 35- unter 45 | 65%  | 69%  | 69%  | 70%  | 73%  | 74%  | 75%  | 71%  | 75%  | 75%  | 75%  | 75%  | 76%  | 78%  |
|          | 45- unter 55 | 61%  | 65%  | 65%  | 66%  | 69%  | 70%  | 71%  | 67%  | 71%  | 71%  | 72%  | 74%  | 75%  | 76%  |
|          | 55- unter 65 | 41%  | 46%  | 47%  | 49%  | 52%  | 54%  | 56%  | 48%  | 52%  | 53%  | 54%  | 58%  | 60%  | 62%  |
| weiblich | 35- unter 45 | 54%  | 58%  | 59%  | 59%  | 63%  | 64%  | 65%  | 47%  | 51%  | 52%  | 53%  | 58%  | 59%  | 62%  |
|          | 45- unter 55 | 55%  | 59%  | 60%  | 60%  | 64%  | 65%  | 65%  | 51%  | 54%  | 55%  | 56%  | 61%  | 63%  | 65%  |
|          | 55- unter 65 | 33%  | 37%  | 39%  | 41%  | 47%  | 49%  | 51%  | 31%  | 35%  | 37%  | 39%  | 45%  | 48%  | 50%  |

Notiz: Datenquelle Statistisches Bundesamt. Eigene Berechnung der Anteile, eigene Darstellung. Die Daten sind nicht vor 2008 verfügbar. Die Erwerbstätigenzahlen sind ausschließlich in diesen Altersgruppen verfügbar. Die Daten für Niedersachsen sind nicht stratifiziert nach Geschlecht verfügbar.

Tabelle S2. Anzahl der Ereignisse und Übergangsrate (pro 100.000 Personenjahre) für die Allgemeinbevölkerung nach Altersgruppe, Geschlecht und Erkrankung.

| Übergang                   |       | MSE                   |               |                       |               | HKE                   |               |                       |               |
|----------------------------|-------|-----------------------|---------------|-----------------------|---------------|-----------------------|---------------|-----------------------|---------------|
|                            |       | Männer                |               | Frauen                |               | Männer                |               | Frauen                |               |
|                            |       | Anzahl der Ereignisse | Übergangsrate | Anzahl der Ereignisse | Übergangsrate | Anzahl der Ereignisse | Übergangsrate | Anzahl der Ereignisse | Übergangsrate |
| Inzidenz                   | 30-34 | 56.025                | 10.576        | 54.778                | 11.514        | 1.051                 | 165           | 685                   | 115           |
|                            | 35-39 | 61.990                | 12.127        | 62.597                | 13.850        | 2.168                 | 337           | 1.371                 | 226           |
|                            | 40-44 | 74.928                | 13.649        | 75.185                | 15.994        | 4.555                 | 630           | 2.659                 | 389           |
|                            | 45-49 | 85.121                | 14.660        | 86.431                | 17.844        | 9.040                 | 1.135         | 4.989                 | 650           |
|                            | 50-54 | 83.707                | 15.889        | 84.000                | 19.587        | 14.585                | 1.938         | 7.854                 | 1.045         |
|                            | 55-59 | 70.280                | 16.802        | 68.918                | 20.048        | 18.691                | 3.007         | 10.589                | 1.595         |
|                            | 60-65 | 59.523                | 16.565        | 59.898                | 19.143        | 23.141                | 4.232         | 15.785                | 2.453         |
| Genesung (MSE)             | 30-34 | 44.060                | 41.020        | 43.285                | 36.681        |                       |               |                       |               |
|                            | 35-39 | 48.845                | 35.912        | 47.771                | 30.482        |                       |               |                       |               |
|                            | 40-44 | 58.297                | 31.207        | 56.186                | 25.477        |                       |               |                       |               |
|                            | 45-49 | 66.171                | 26.447        | 64.221                | 21.508        |                       |               |                       |               |
|                            | 50-54 | 63.360                | 21.730        | 62.351                | 17.668        |                       |               |                       |               |
|                            | 55-59 | 52.625                | 17.307        | 52.026                | 14.105        |                       |               |                       |               |
|                            | 60-65 | 47.149                | 13.727        | 46.991                | 11.259        |                       |               |                       |               |
| Versterben nach Erkrankung | 30-34 | 122                   | 114           | 59                    | 50            | 35                    | 2.427         | 26                    | 2.625         |
|                            | 35-39 | 167                   | 123           | 115                   | 73            | 70                    | 2.422         | 49                    | 2.540         |
|                            | 40-44 | 409                   | 219           | 292                   | 132           | 148                   | 2.383         | 84                    | 2.228         |
|                            | 45-49 | 940                   | 376           | 563                   | 189           | 369                   | 2.908         | 194                   | 2.733         |
|                            | 50-54 | 1.745                 | 598           | 1.043                 | 296           | 747                   | 3.558         | 357                   | 3.114         |
|                            | 55-59 | 3.053                 | 1.004         | 1.778                 | 482           | 1.163                 | 4.137         | 531                   | 3.335         |
|                            | 60-65 | 5.361                 | 1.561         | 3.194                 | 765           | 1.907                 | 5.352         | 942                   | 3.886         |
| Versterben erkrankungsfrei | 30-34 | 441                   | 83            | 198                   | 42            | 513                   | 81            | 223                   | 38            |
|                            | 35-39 | 740                   | 145           | 320                   | 71            | 811                   | 127           | 367                   | 61            |
|                            | 40-44 | 1.212                 | 221           | 571                   | 121           | 1.380                 | 193           | 724                   | 106           |
|                            | 45-49 | 2.271                 | 391           | 1.005                 | 207           | 2.550                 | 326           | 1.273                 | 167           |
|                            | 50-54 | 3.580                 | 680           | 1.517                 | 354           | 3.853                 | 527           | 1.968                 | 266           |
|                            | 55-59 | 4.613                 | 1.103         | 1.955                 | 569           | 4.856                 | 815           | 2.676                 | 412           |
|                            | 60-65 | 6.881                 | 1.915         | 2.814                 | 899           | 6.719                 | 1.303         | 3.833                 | 616           |

Notiz: Eigene Berechnungen, Datenquelle AOK Niedersachsen. Datenquelle AOK Niedersachsen. Die im Nenner einbezogenen Personenjahre zur Berechnung der Übergangsrate Genesung (MSE) (Jahre nach Inzidenz bis Genesung) unterscheiden sich von den im Nenner einbezogenen Personenjahren Inzidenz (MSE) (erkrankungsfreie Jahre), dies trägt zu Unterschieden in der Höhe der beiden Raten bei.
